# Supplementary material for: Nutritional Properties and In Vitro Antidiabetic Activities of Blue and Yellow Corn Extracts: A Comparative Study
Source: Hindawi journal article supplement (doi:10.1155/2021/8813613), 2021-01-25
Supplement: f1 [file 8813613.f1.docx]

Suplementary materials:

S.1

1H spectrum of fraction I;

13C spectrum of fraction I;

S.2


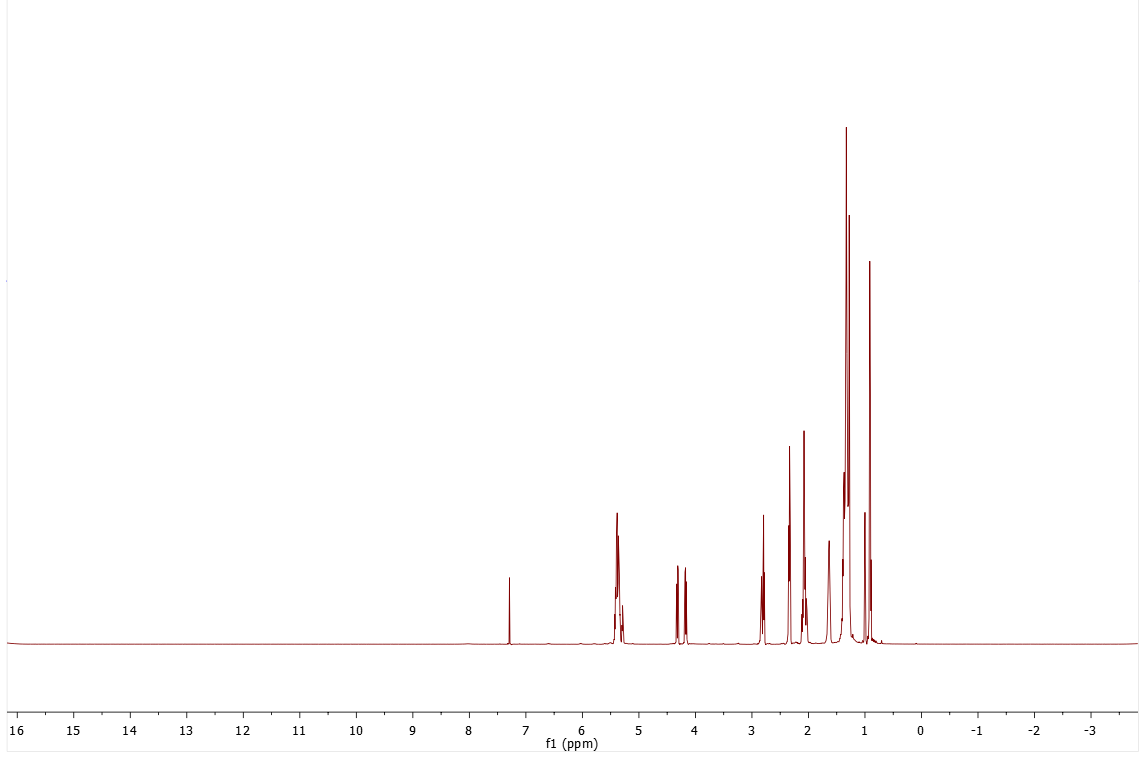


1H spectrum of fraction II;


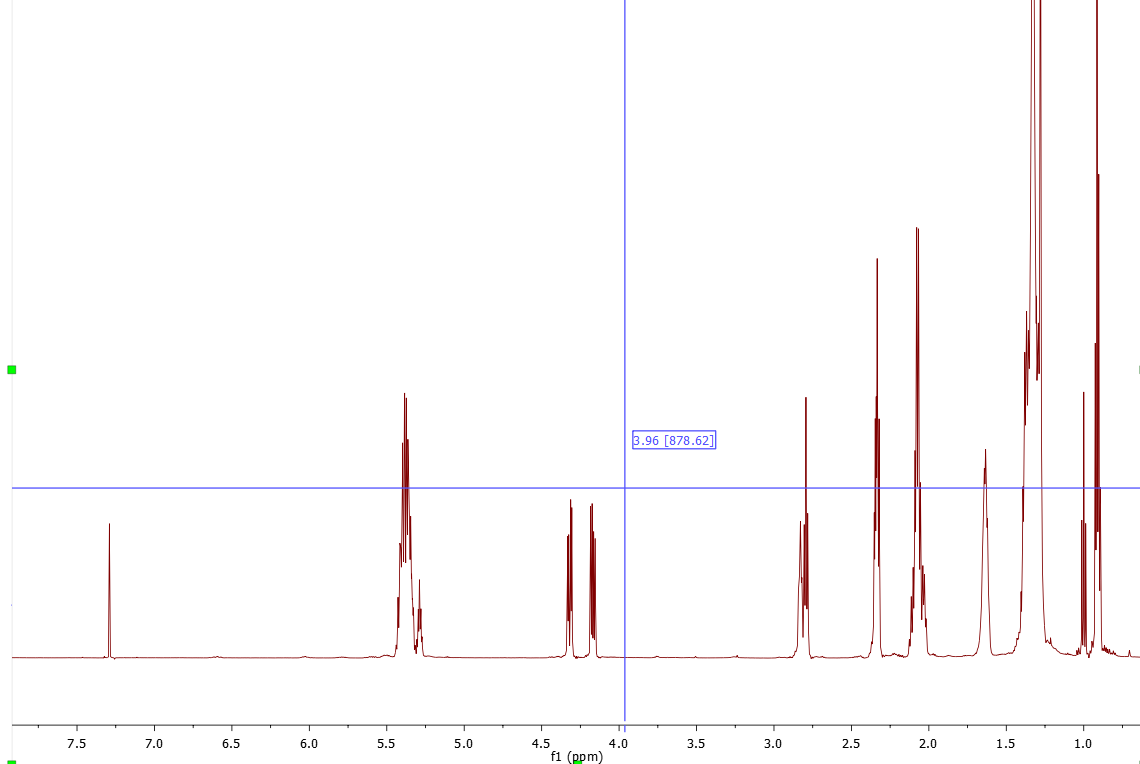


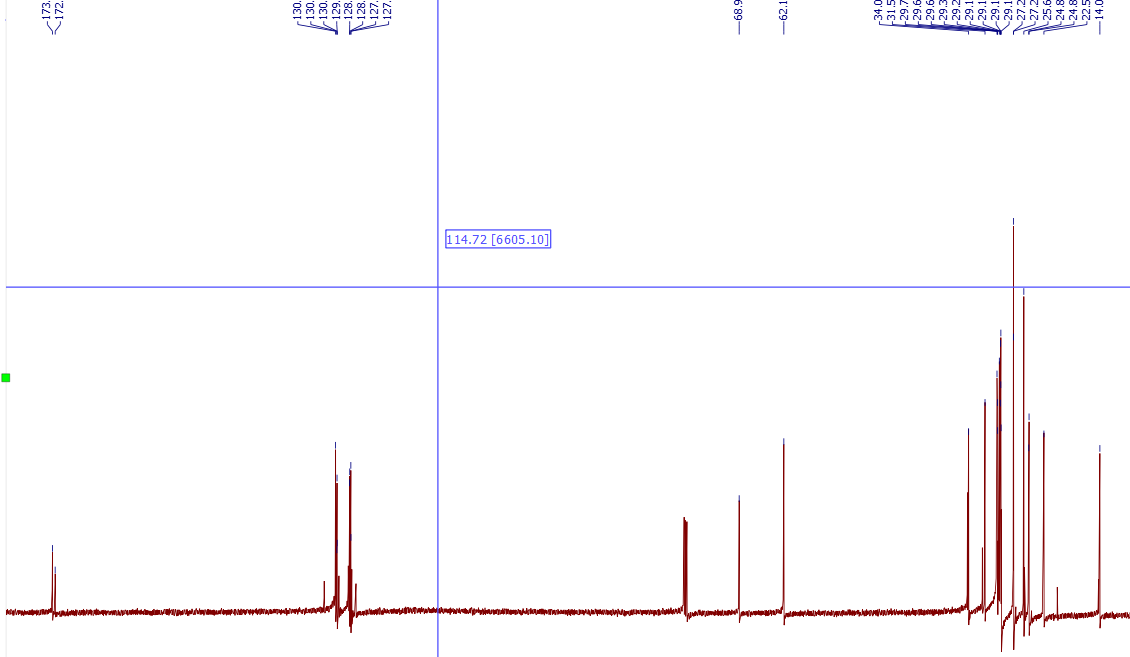


13C spectrum of fraction II;


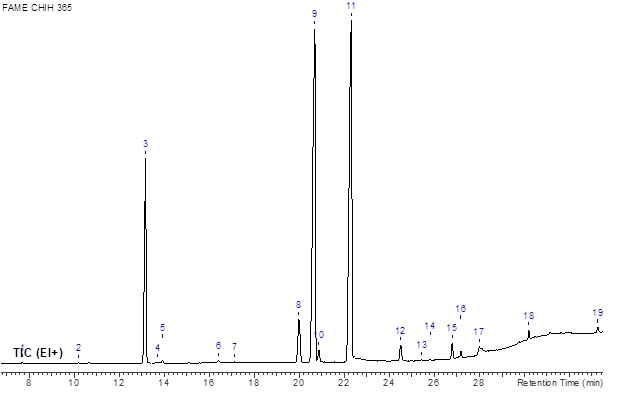
S.3

FAME profile of blue corn line CHIH 365


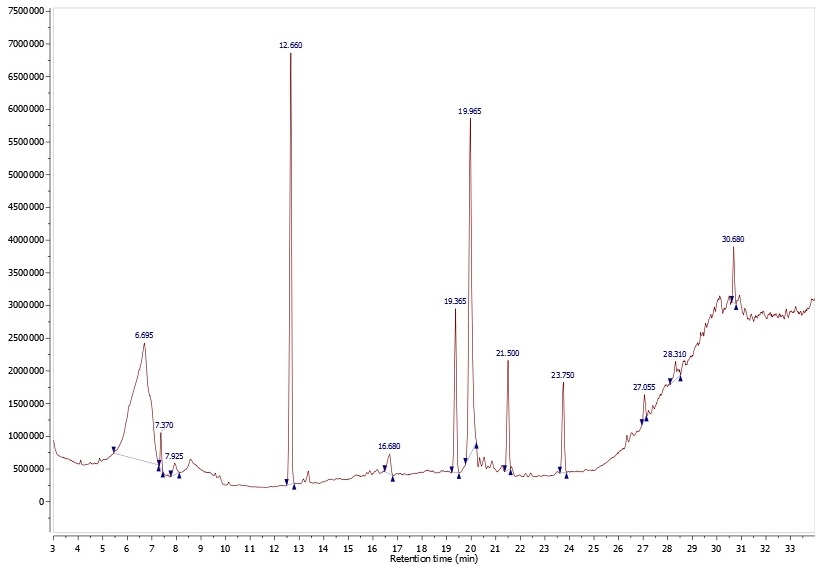
S.4

FAME profile of blue corn line CHIH 367


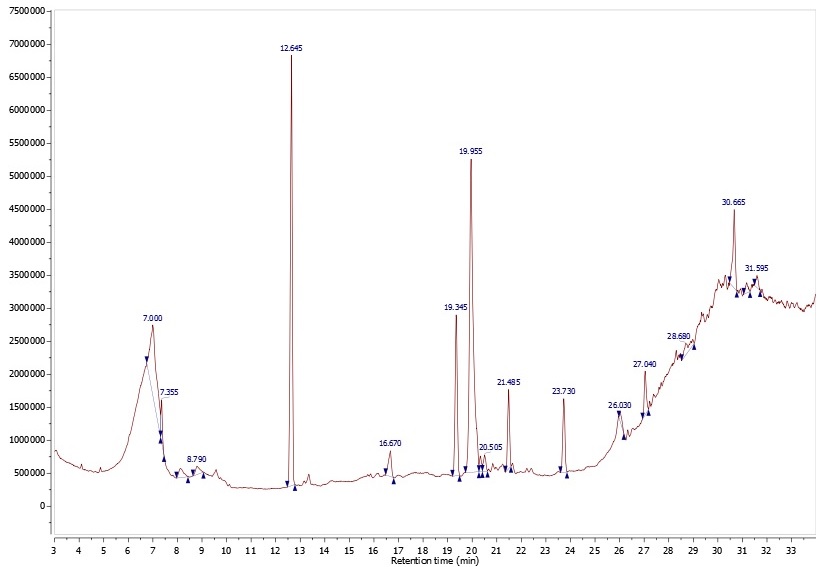
S.5

FAME profile of blue corn line CHIH 503


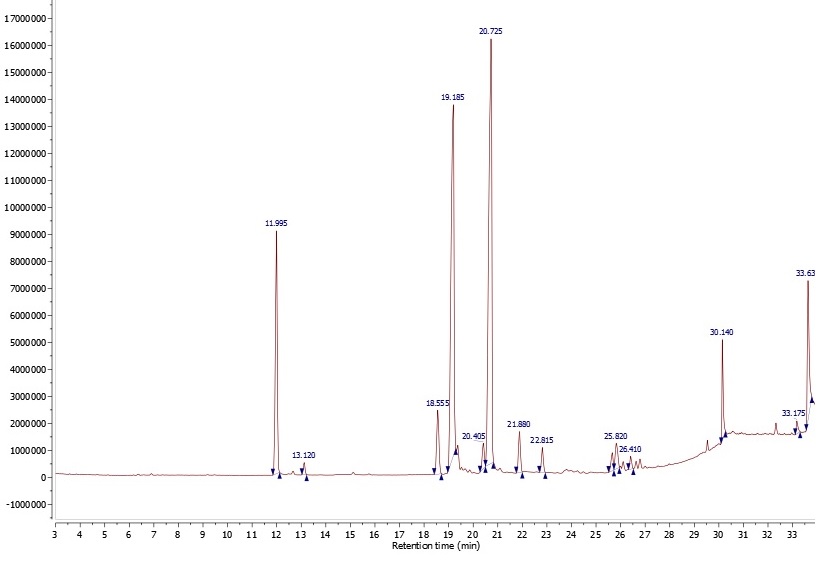
S.6

FAME profile of yellow corn variety KUSKUN


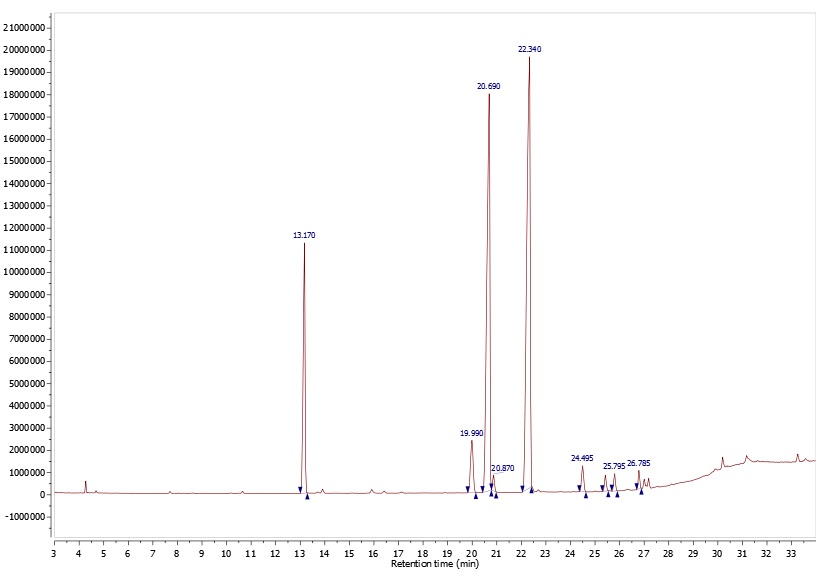
S.7

FAME profile of yellow corn variety OPOKA


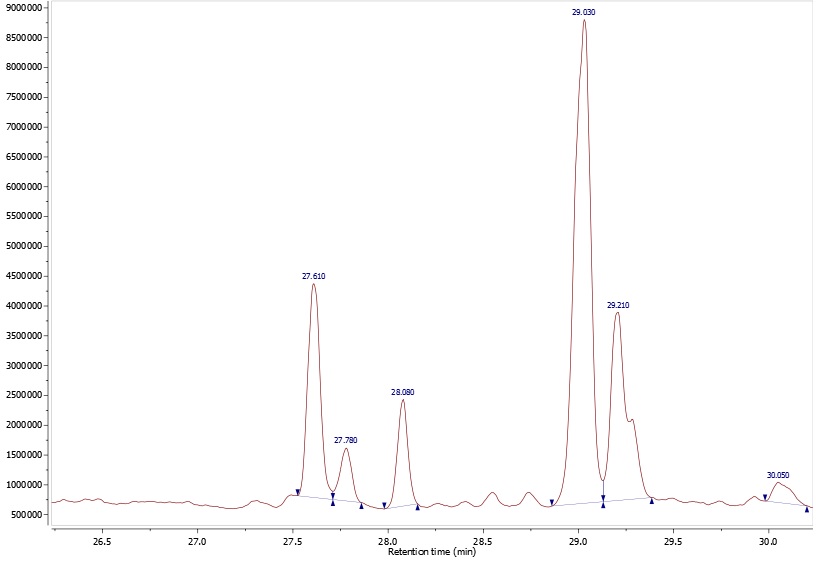
S.8

Sterols profile of blue corn line CHIH 365


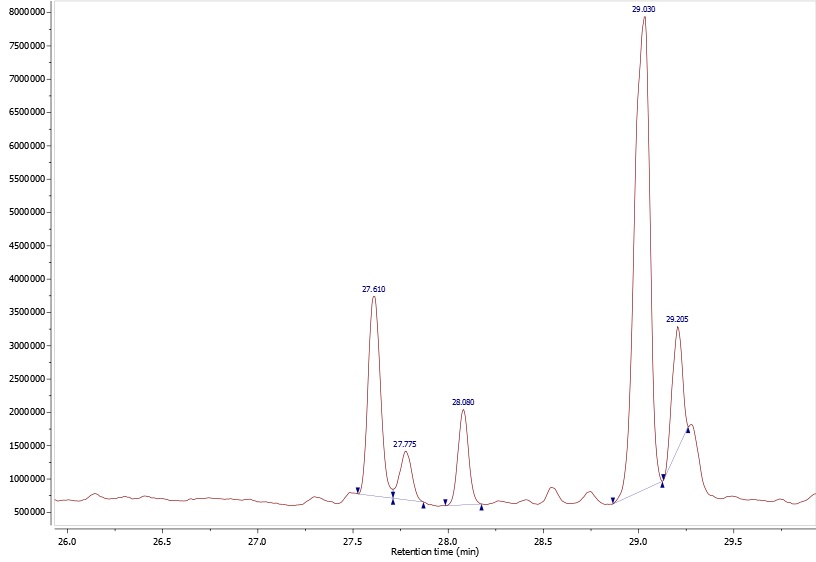
S.9

Sterols profile of blue corn line CHIH 367


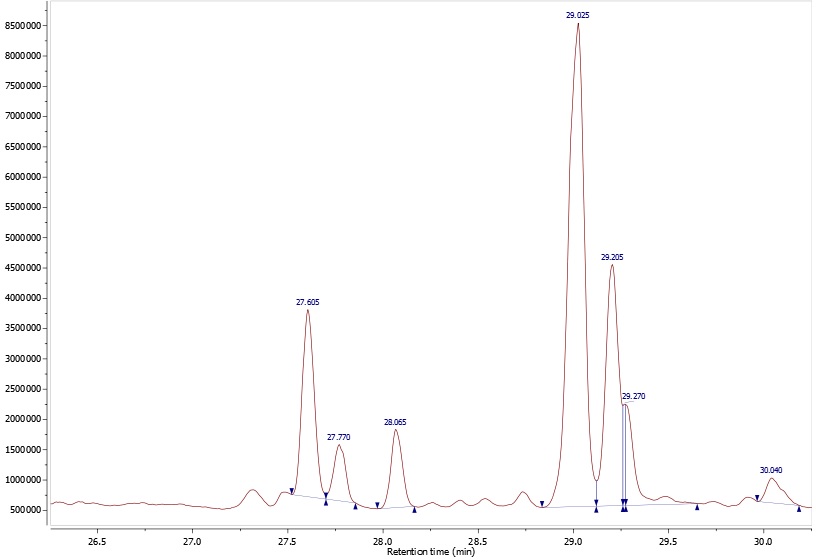
S.10

Sterols profile of blue corn line CHIH 503


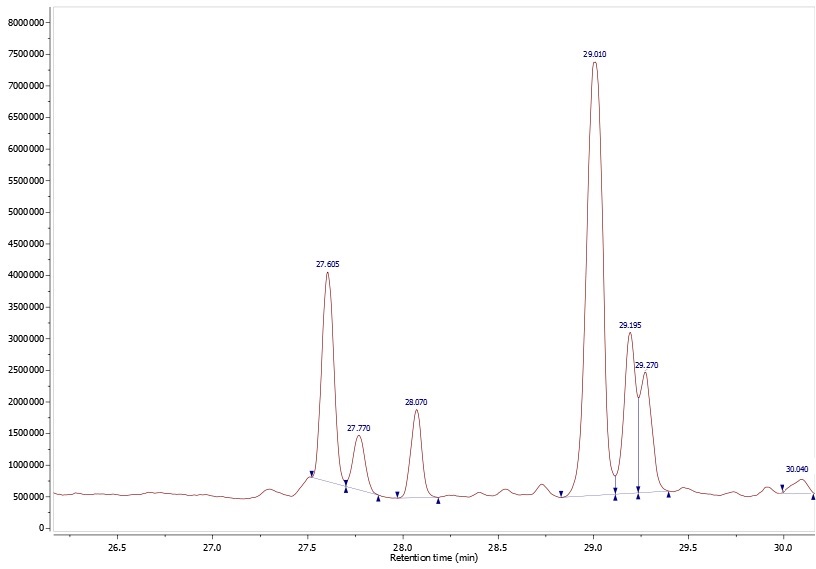
S.11

Sterols profile of yellow corn variety KUSKUN


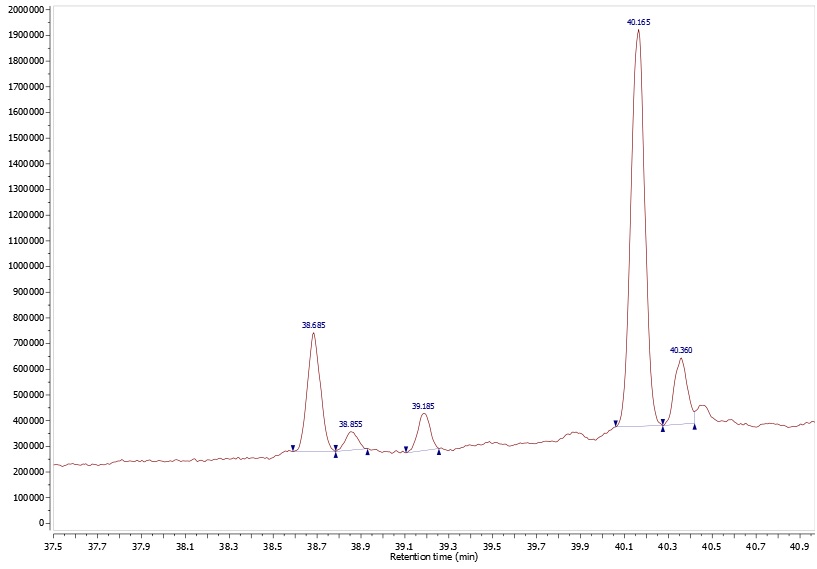
S.12

Sterols profile of yellow corn variety OPOKA


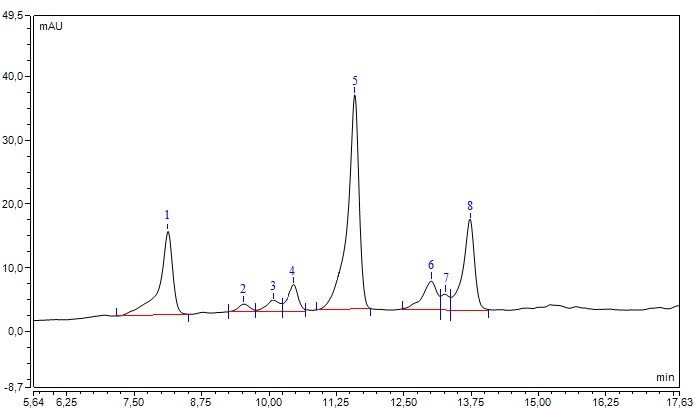
S.13

Profile of polyphenolic compounds - anthocyanins of blue maize line CHIH 365


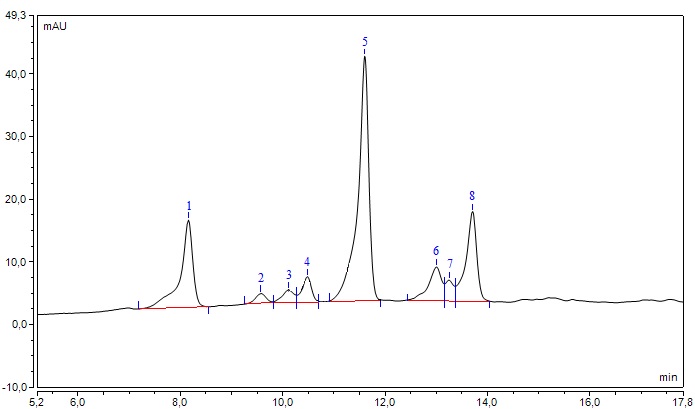
S.14

Profile of polyphenolic compounds - anthocyanins of blue maize line CHIH 367


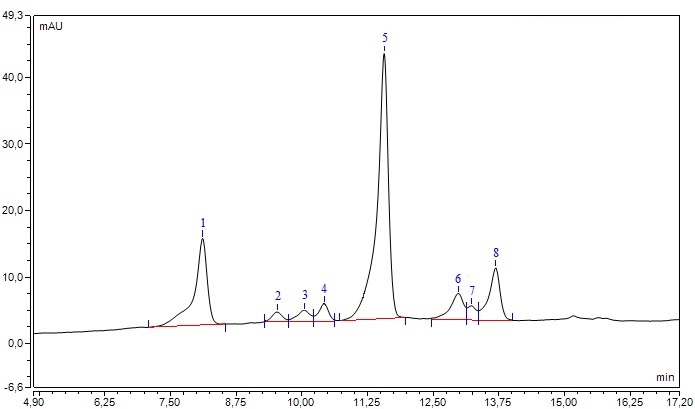
S.15

Profile of polyphenolic compounds - anthocyanins of blue maize line CHIH 503


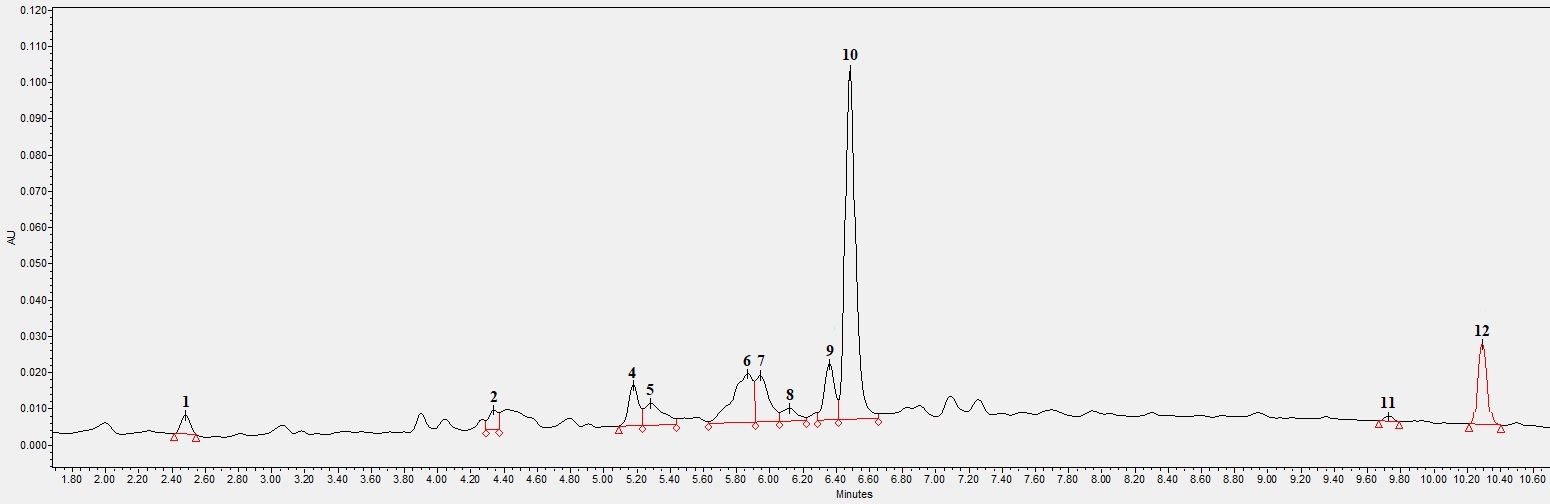
S.16

Profile of phenolic acids quantified of blue maize line CHIH 365


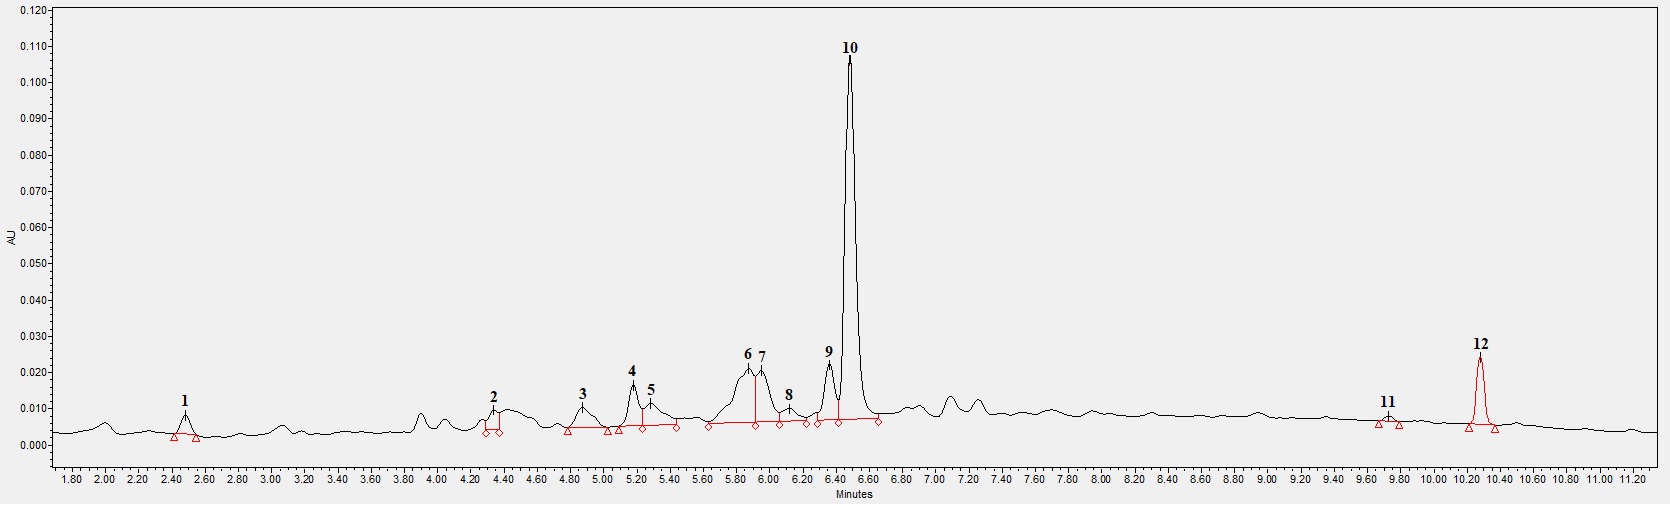
S.17

Profile of phenolic acids quantified of blue maize line CHIH 367


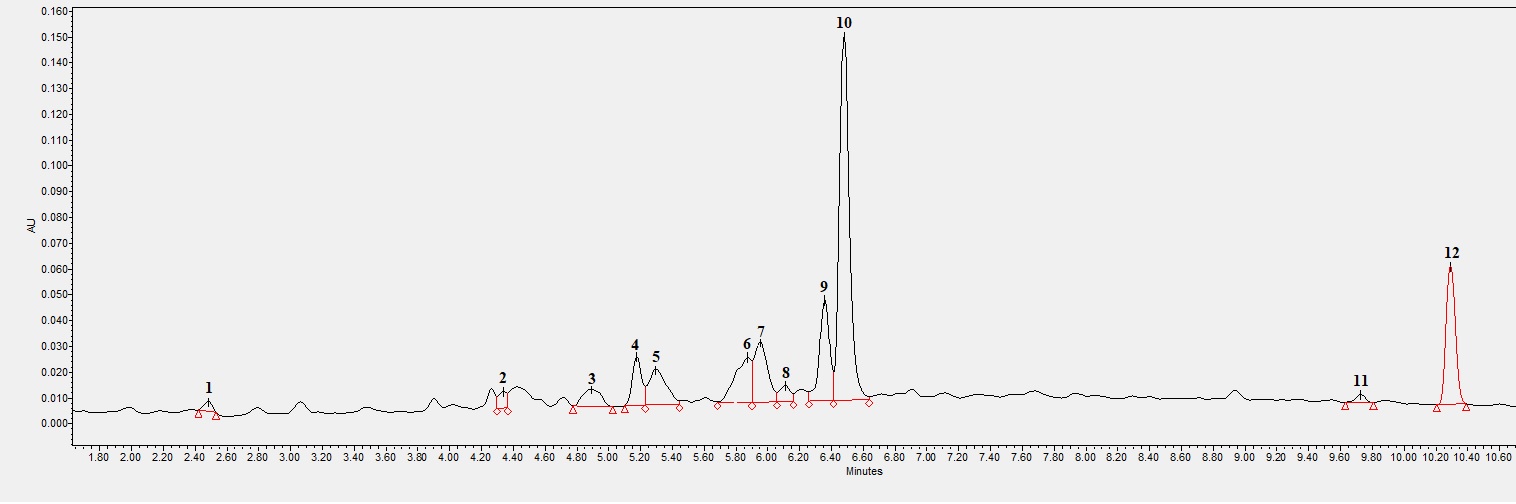
S.18

Profile of phenolic acids quantified of blue maize line CHIH 503


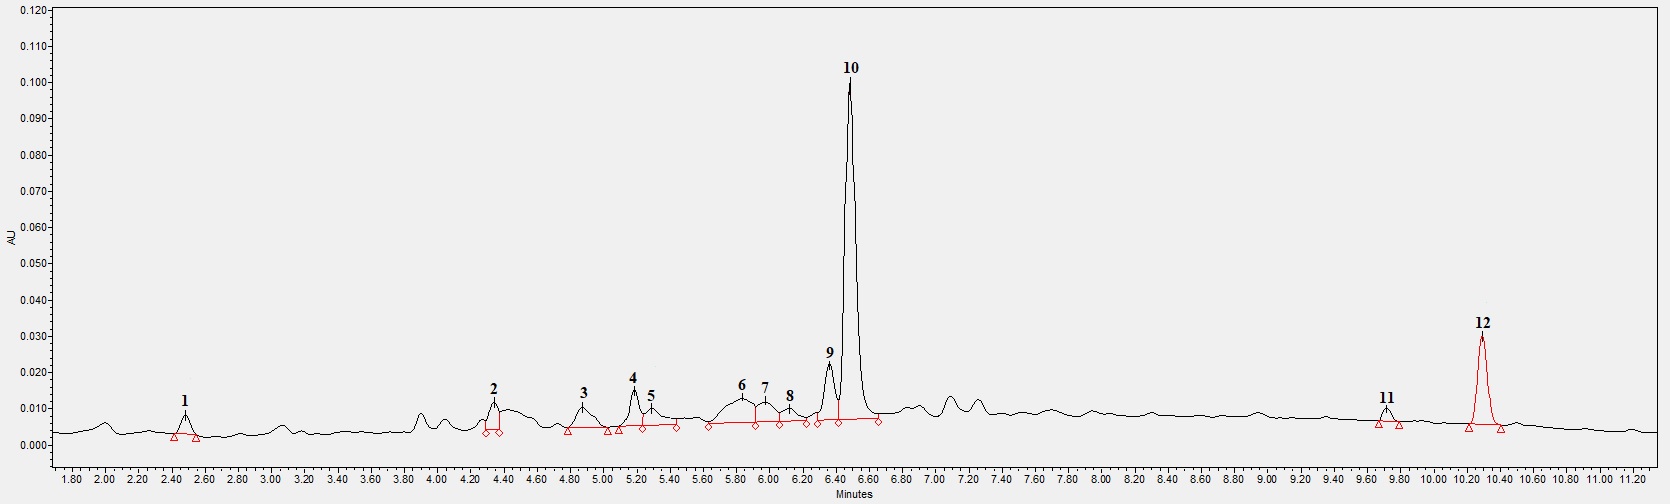
S.19

Profile of phenolic acids quantified of yellow corn variety OPOKA
